# Supplementary material for: Prospects for Bioenergy Development Potential from Dedicated Energy Crops in Ecuador: An Agroecological Zoning Study
Source: MDPI journal article supplement (doi:10.3390/agriculture13010186), 2023-01-11
Supplement: s1 [file s1]

Supplementary material 1

Table S1. Excluded crops considered food safety

|              |               |            |                  |               |               |
|--------------|---------------|------------|------------------|---------------|---------------|
| Abaca        | Chocho        | Potato     | Cocoa            | Mango         | Tomato        |
| Avocado      | Cabbage       | Papaya     | Coffee           | Peanut        | Wheat         |
| Chili pepper | Peach         | Pickle     | Sweet potato     | Passion fruit | Grape         |
| Garlic       | Frijole       | Pepper     | Brown sugar cane | Melloco       | Uvilla        |
| Alfalfa      | Strawberry    | Pineapple  | Sugar cane       | Melon         | Green beans   |
| Cotton       | Passion fruit | Pitahaya   | Barley           | Blackberry    | Yucca         |
| Amaranth     | Soursop       | Banana     | White onion      | Orange        | Yellow carrot |
| Rice         | Guava         | Quinoa     | Colored onion    | Orange        | White carrot  |
| Peas         | Bean          | Watermelon | Pearl onion      | Goose         | Squash        |
| Oat          | Lettuce       | Soy        | Rye              | Baby banana   | Palm heart    |
| Food oats    | Lemon         | Tobacco    | Custard apple    | Oil palm      | Tree tomato   |
| Banana       | Corn          | Tea        | Broccoli         | Tangerine     |               |

Supplementary material 2

Table S2. Energy yield per technology by province MWh/ year.

| PROVINCE        | Gross Energy potential GJ/year |           |            |            |         |            | Total MWh/<br>year | Energy yield per technology MWh/ year                      |                   |                                                        |                   |                                                         |                   |                                                            |                   |                                                             |                   |                                            |                   |
|-----------------|--------------------------------|-----------|------------|------------|---------|------------|--------------------|------------------------------------------------------------|-------------------|--------------------------------------------------------|-------------------|---------------------------------------------------------|-------------------|------------------------------------------------------------|-------------------|-------------------------------------------------------------|-------------------|--------------------------------------------|-------------------|
|                 |                                |           |            |            |         |            |                    | Steam power plants<br>(backpressure turbines) 20-<br>25 MW |                   | Steam power plants<br>(condensing turbines) 5–50<br>MW |                   | Externally-fired gas turbines<br>5–25 MW (simple cycle) |                   | Externally-fired gas turbines<br>10–30 MW (combined cycle) |                   | Biomass integrated<br>gasification 40–60 MW<br>simple cycle |                   | Combined cycle 90–100 MW<br>combined cycle |                   |
|                 | Bamboo                         | Hemp      | Eucalyptus | Giant reed | Pine    | Miscanthus |                    | Lower limit<br>10%                                         | Uper limit<br>20% | Lower limit<br>22%                                     | Uper limit<br>28% | Lower<br>limit 25%                                      | Uper limit<br>30% | Lower limit<br>30%                                         | Uper limit<br>40% | Lower limit<br>21%                                          | Uper limit<br>25% | Lower limit<br>35%                         | Uper limit<br>40% |
| AZUAY           | 0                              | 28,109    | 1,842,622  | 1,610,232  | 94,419  | 223,374    | 1,055,210          | 105,521                                                    | 211,042           | 232,146                                                | 295,459           | 263,802                                                 | 316,563           | 316,563                                                    | 422,084           | 221,594                                                     | 263,802           | 369,323                                    | 422,084           |
| BOLIVAR         | 369,092                        | 2,575     | 305,173    | 252,975    | 69,189  | 18,471     | 282,632            | 28,263                                                     | 56,526            | 62,179                                                 | 79,137            | 70,658                                                  | 84,790            | 84,790                                                     | 113,053           | 59,353                                                      | 70,658            | 98,921                                     | 113,053           |
| CAÑAR           | 0                              | 0         | 540,386    | 414,960    | 17,837  | 3,870      | 271,404            | 27,140                                                     | 54,281            | 59,709                                                 | 75,993            | 67,851                                                  | 81,421            | 81,421                                                     | 108,561           | 56,995                                                      | 67,851            | 94,991                                     | 108,561           |
| CARCHI          | 0                              | 23,181    | 229,136    | 632,444    | 114,572 | 103,170    | 306,251            | 30,625                                                     | 61,250            | 67,375                                                 | 85,750            | 76,563                                                  | 91,875            | 91,875                                                     | 122,500           | 64,313                                                      | 76,563            | 107,188                                    | 122,500           |
| CHIMBORAZO      | 0                              | 46,940    | 1,192,385  | 458,950    | 210,862 | 116,165    | 562,584            | 56,258                                                     | 112,517           | 123,768                                                | 157,523           | 140,646                                                 | 168,775           | 168,775                                                    | 225,033           | 118,143                                                     | 140,646           | 196,904                                    | 225,033           |
| COTOPAXI        | 0                              | 1,486     | 2,295,333  | 43,861     | 228,964 | 301,025    | 797,408            | 79,741                                                     | 159,482           | 175,430                                                | 223,274           | 199,352                                                 | 239,222           | 239,222                                                    | 318,963           | 167,456                                                     | 199,352           | 279,093                                    | 318,963           |
| EL ORO          | 0                              | 140,817   | 70,313     | 1,009,911  | 3,999   | 772,372    | 554,837            | 55,484                                                     | 110,967           | 122,064                                                | 155,354           | 138,709                                                 | 166,451           | 166,451                                                    | 221,935           | 116,516                                                     | 138,709           | 194,193                                    | 221,935           |
| ESMERALDAS      | 4,261,758                      | 238,545   | 0          | 515,044    | 0       | 599,256    | 1,559,612          | 155,961                                                    | 311,922           | 343,115                                                | 436,691           | 389,903                                                 | 467,884           | 467,884                                                    | 623,845           | 327,519                                                     | 389,903           | 545,864                                    | 623,845           |
| GUAYAS          | 0                              | 2,361,446 | 0          | 1,092,140  | 0       | 3,668,670  | 1,978,404          | 197,840                                                    | 395,681           | 435,249                                                | 553,953           | 494,601                                                 | 593,521           | 593,521                                                    | 791,362           | 415,465                                                     | 494,601           | 692,442                                    | 791,362           |
| IMBABURA        | 464,090                        | 258       | 1,629,901  | 2,316,434  | 686,203 | 26,954     | 1,423,289          | 142,329                                                    | 284,658           | 313,124                                                | 398,521           | 355,822                                                 | 426,987           | 426,987                                                    | 569,315           | 298,891                                                     | 355,822           | 498,151                                    | 569,315           |
| LOS RIOS        | 596,047                        | 0         | 0          | 0          | 0       | 0          | 165,568            | 16,557                                                     | 33,114            | 36,425                                                 | 46,359            | 41,392                                                  | 49,671            | 49,671                                                     | 66,227            | 34,769                                                      | 41,392            | 57,949                                     | 66,227            |
| MANABI          | 135,086                        | 0         | 0          | 0          | 0       | 0          | 37,524             | 3,752                                                      | 7,505             | 8,255                                                  | 10,507            | 9,381                                                   | 11,257            | 11,257                                                     | 15,010            | 7,880                                                       | 9,381             | 13,133                                     | 15,010            |
| LOJA            | 0                              | 55,201    | 378,535    | 10,681,350 | 368     | 96,796     | 3,114,514          | 311,451                                                    | 622,903           | 685,193                                                | 872,064           | 778,628                                                 | 934,354           | 934,354                                                    | 1,245,806         | 654,048                                                     | 778,628           | 1,090,080                                  | 1,245,806         |
| LOS RIOS        | 0                              | 42,979    | 0          | 11,290     | 0       | 0          | 15,075             | 1,507                                                      | 3,015             | 3,316                                                  | 4,221             | 3,769                                                   | 4,522             | 4,522                                                      | 6,030             | 3,166                                                       | 3,769             | 5,276                                      | 6,030             |
| MANABI          | 0                              | 1,060,582 | 0          | 8,478,116  | 0       | 4,028,158  | 3,768,571          | 376,857                                                    | 753,714           | 829,086                                                | 1,055,200         | 942,143                                                 | 1,130,571         | 1,130,571                                                  | 1,507,428         | 791,400                                                     | 942,143           | 1,319,000                                  | 1,507,428         |
| MORONA SANTIAGO | 1,616,930                      | 0         | 16,866     | 3,177,926  | 157     | 0          | 1,336,633          | 133,663                                                    | 267,327           | 294,059                                                | 374,257           | 334,158                                                 | 400,990           | 400,990                                                    | 534,653           | 280,693                                                     | 334,158           | 467,822                                    | 534,653           |
| NAPO            | 0                              | 0         | 9,798      | 0          | 0       | 0          | 2,722              | 272                                                        | 544               | 599                                                    | 762               | 680                                                     | 817               | 817                                                        | 1,089             | 572                                                         | 680               | 953                                        | 1,089             |
| ORELLANA        | 0                              | 0         | 0          | 0          | 0       | 0          | 0                  | 0                                                          | 0                 | 0                                                      | 0                 | 0                                                       | 0                 | 0                                                          | 0                 | 0                                                           | 0                 | 0                                          | 0                 |
| PASTAZA         | 0                              | 0         | 0          | 0          | 0       | 0          | 0                  | 0                                                          | 0                 | 0                                                      | 0                 | 0                                                       | 0                 | 0                                                          | 0                 | 0                                                           | 0                 | 0                                          | 0                 |
| PICHINCHA       | 90                             | 22,619    | 3,687,388  | 2,787,703  | 630,846 | 65,112     | 1,998,266          | 199,827                                                    | 399,653           | 439,619                                                | 559,514           | 499,567                                                 | 599,480           | 599,480                                                    | 799,306           | 419,636                                                     | 499,567           | 699,393                                    | 799,306           |

|                                |           |           |            |            |           |            |            |           |           |           |           |           |           |           |           |           |           |           |           |
|--------------------------------|-----------|-----------|------------|------------|-----------|------------|------------|-----------|-----------|-----------|-----------|-----------|-----------|-----------|-----------|-----------|-----------|-----------|-----------|
| SANTO DOMINGO DE LOS TSACHILAS | 759,002   | 130,948   | 0          | 465,842    | 0         | 1,541,172  | 804,713    | 80,471    | 160,943   | 177,037   | 225,320   | 201,178   | 241,414   | 241,414   | 321,885   | 168,990   | 201,178   | 281,649   | 321,885   |
| SANTA ELENA                    | 0         | 0         | 0          | 7,341      | 0         | 0          | 2,039      | 204       | 408       | 449       | 571       | 510       | 612       | 612       | 816       | 428       | 510       | 714       | 816       |
| TUNGURAHUA                     | 0         | 0         | 0          | 148        | 0         | 0          | 41         | 4         | 8         | 9         | 12        | 10        | 12        | 12        | 16        | 9         | 10        | 14        | 16        |
| SUCUMBIOS                      | 1,154,042 | 0         | 387,214    | 59,307     | 59,840    | 52,251     | 475,737    | 47,574    | 95,147    | 104,662   | 133,206   | 118,934   | 142,721   | 142,721   | 190,295   | 99,905    | 118,934   | 166,508   | 190,295   |
| ZAMORA CHINCHIPE               | 272,824   | 0         | 1,104,701  | 2,203,640  | 0         | 68         | 994,787    | 99,479    | 198,957   | 218,853   | 278,540   | 248,697   | 298,436   | 298,436   | 397,915   | 208,905   | 248,697   | 348,175   | 397,915   |
| TOTAL                          | 9,628,960 | 4,155,687 | 13,689,749 | 36,219,616 | 2,117,257 | 11,616,883 | 21,507,820 | 2,150,782 | 4,301,564 | 4,731,720 | 6,022,190 | 5,376,955 | 6,452,346 | 6,452,346 | 8,603,128 | 4,516,642 | 5,376,955 | 7,527,737 | 8,603,128 |
